# Supplementary material for: Additive effects of booster mRNA vaccination and SARS-CoV-2 Omicron infection on T cell immunity across immunocompromised states
Source: PubMed Central journal article supplement (PMC7615622; doi:10.1126/scitranslmed.adg9452), 2023-07-12
Supplement: EMS193806-supplement-Supplementary_Figures_and_Tables.pdf [file EMS193806-supplement-Supplementary_Figures_and_Tables.pdf]

## LIST OF SUPPLEMENTARY MATERIALS

**Suppl. Fig. 1.** T cell responses to ancestral mRNA vaccine doses over time.

**Suppl. Fig. 2.** Individual variability of vaccine-induced Omicron-reactive T cell responses based on disease, age, and number of received vaccine doses

**Suppl. Fig. 3.** Vaccine-induced T cell responses are synchronized with antibody titers and display an inflammatory immune signature.

**Suppl. Fig. 4.** T<sub>helper</sub> subsets and memory phenotypes of Omicron-reactive T cells before and after booster dose.

**Suppl. Fig. 5.** Heterogeneity of Omicron spike-reactive CD8<sup>+</sup> T<sub>EMRA</sub> T cells.

**Suppl. Fig. 6.** Wu-Hu.1 and Omicron spike-specific responses in infected and non-infected individuals across all patient groups.

**Supplementary Table S1:** Cohort characteristics at baseline, vaccine doses and sampling information

**Supplementary Table S2:** Clinical parameters and demographics of Omicron-wave infected and non-infected individuals

**Supplementary Table S3.** SARS-CoV-2 spike T cell epitopes previously reported immunodominant and from natural infection

**Supplementary Table S4.** SARS-CoV-2 T cell epitopes previously reported immunogenic and induced by vaccination

**Supplementary Table S5.** Omicron variant (B.1.1.529) T cell epitopes

**Supplementary Table S6:** Antibody list

**Supplementary Table S7:** Raw data

# SUPPLEMENTARY MATERIALS

## SUPPLEMENTARY FIGURES

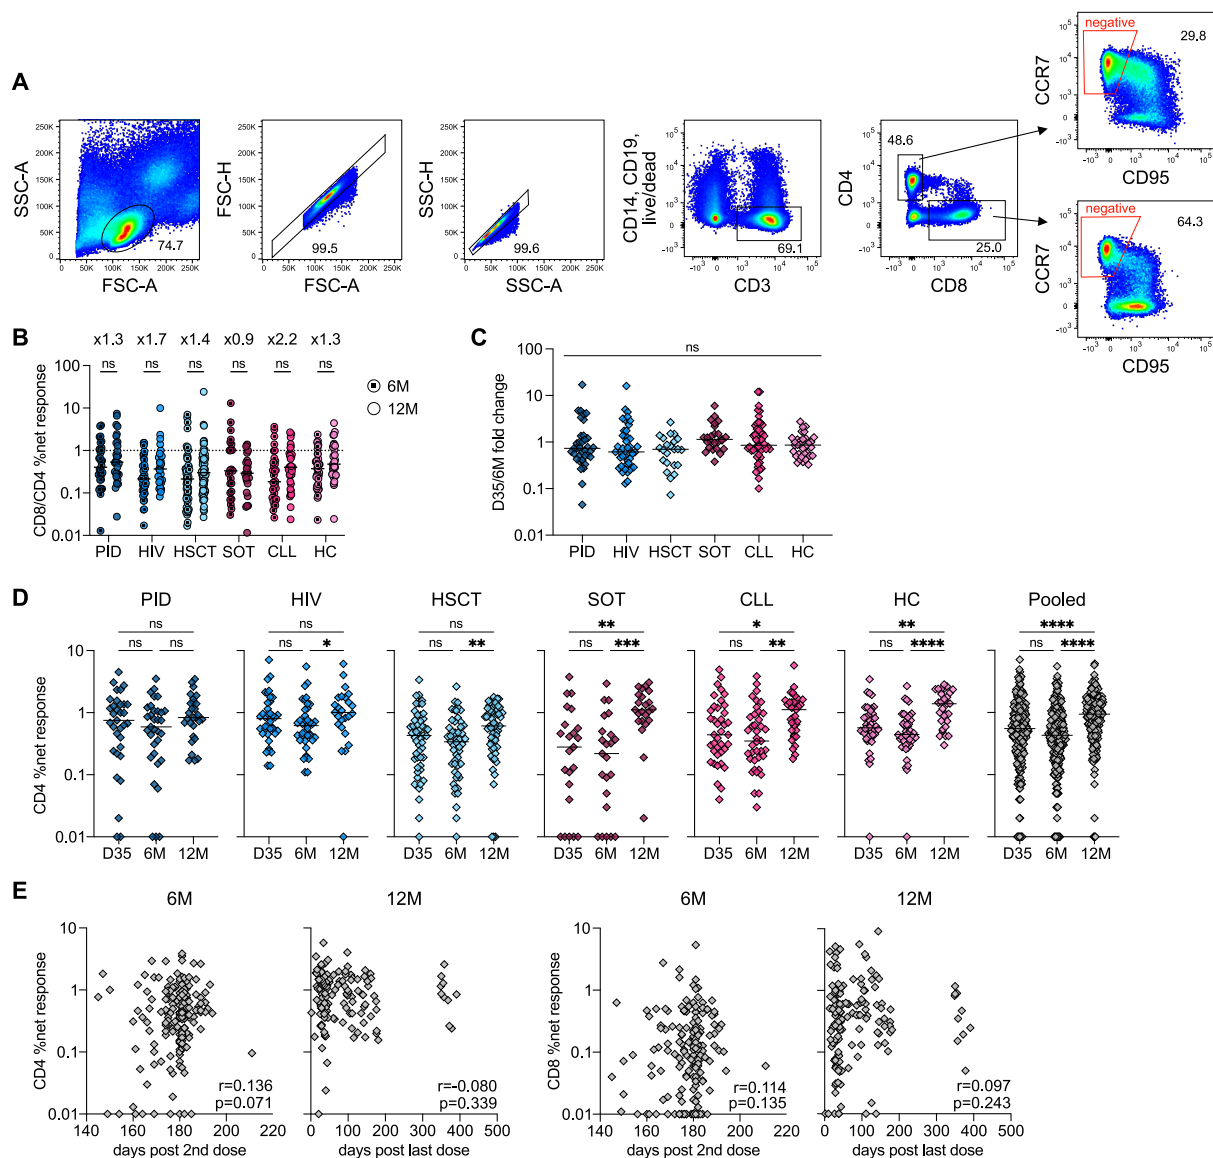

**Suppl. Fig. 1. T cell responses to ancestral mRNA vaccine doses over time. (A)** Gating on non-naïve/memory CD4<sup>+</sup> and CD8<sup>+</sup> T cells. Numbers indicate the percentage of the previous gate. **(B)** Comparison of pre- and post-booster CD8<sup>+</sup> to CD4<sup>+</sup> net-frequency ratio in response to Omicron full spike with indicated fold changes. **(C)** D35/6M fold change of CD4<sup>+</sup> %net responses to Wu-Hu.1 full spike calculated with data from (18). **(D)** D35/6M decay rate was used to extrapolate D35 CD4<sup>+</sup> %net responses to Wu-Hu.1 full spike based on the here reported data. **(E)** Correlation of elapsed time between second or last vaccine dose with T cell %net responses to WT full spike at 6M and 12M with indicated Spearman correlation and p-values. Individuals who experienced an additional infection were excluded from this analysis. (B to E) Each dot represents one donor and lines depict the median. (B) Mann-Whitney test with Holm-Šidák posttest. (C, D) Kruskal Wallis test with Dunn's posttest. \*\*\*\*p < 0.0001, \*\*\*p < 0.001, \*\*p < 0.01, \*p < 0.05

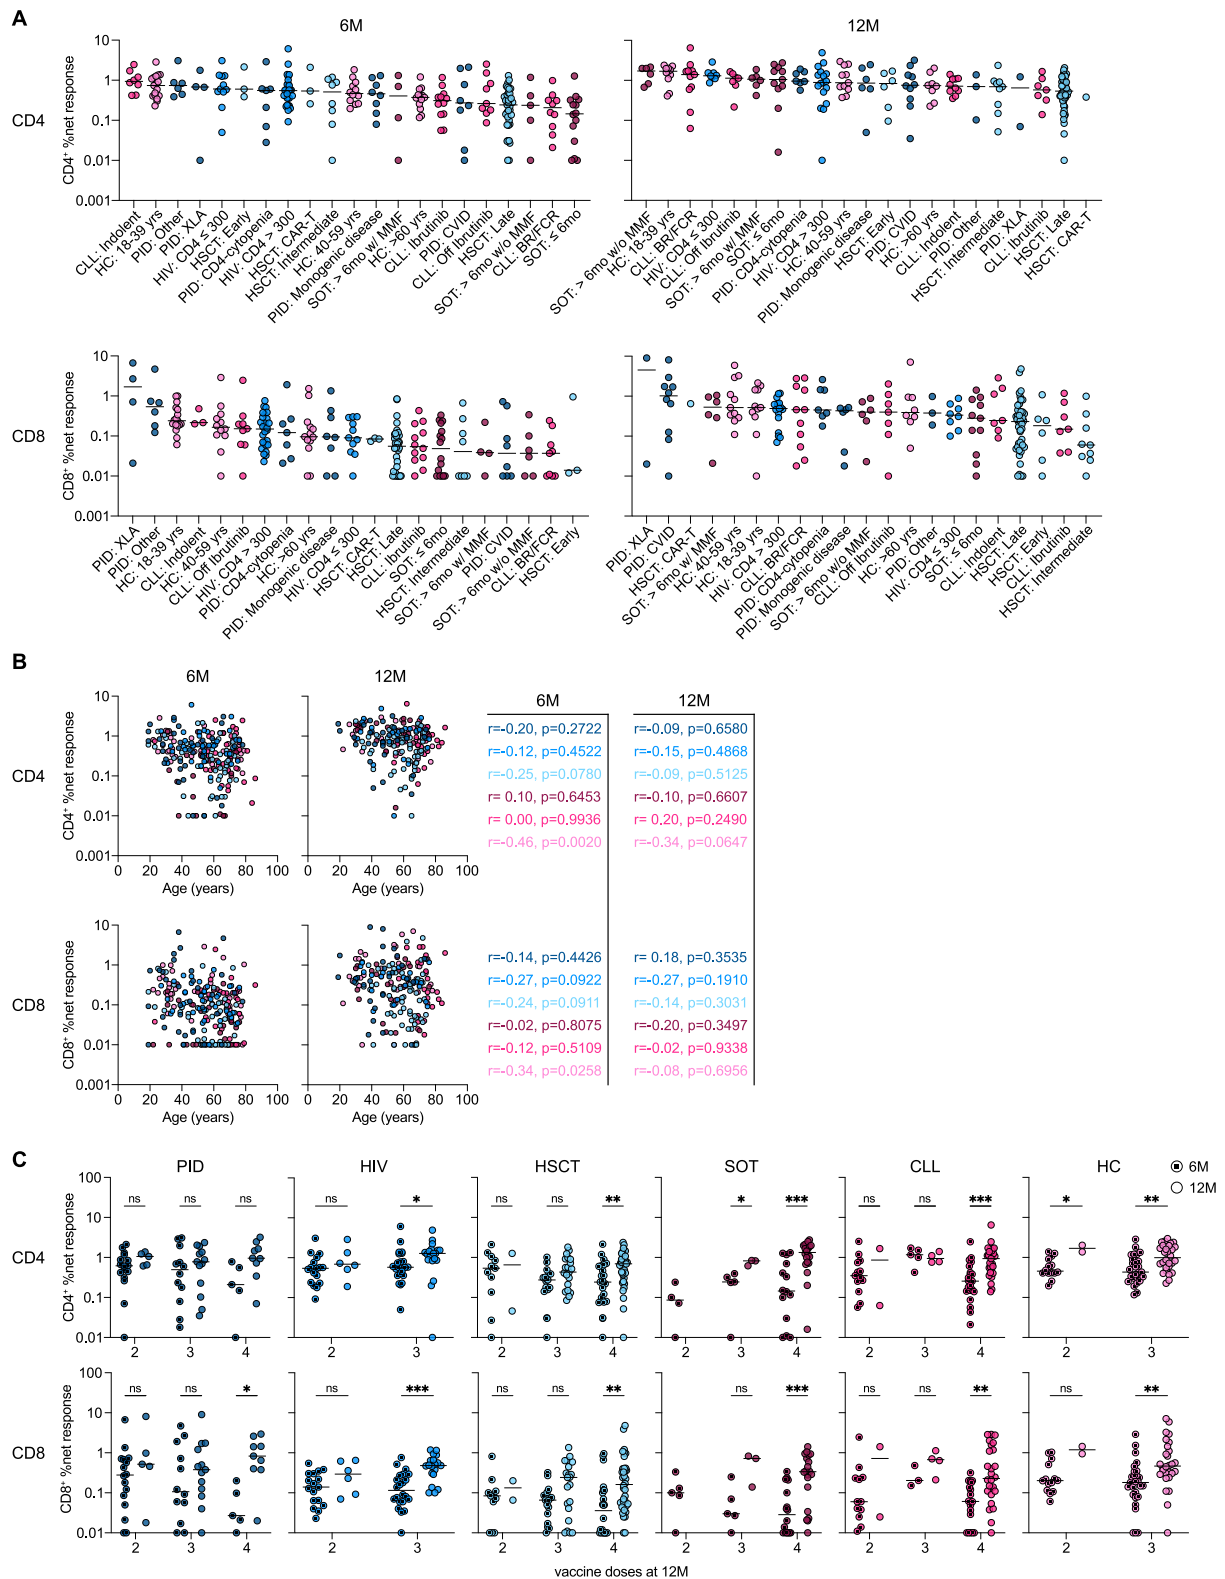

**Suppl. Fig. 2. Individual variability of vaccine-induced Omicron-reactive T cell responses based on disease, age, and number of received vaccine doses. (A)** Net frequencies of T cell responses across all patient subgroups. **(B)** Correlation of patient age with respective T cell responses at 6M and 12M with indicated Spearman correlation and p-values. **(C)** Comparison of pre- and post-booster T cell responses based on the number of received vaccine doses at 12M. (A to C) T cell responses to Omicron full spike peptide pool. Each dot represents one donor and lines depict the median. (C) Mann-Whitney test with Holm-Šidák posttest. \*\*\* $p < 0.001$ , \*\* $p < 0.01$ , \* $p < 0.05$

**A**

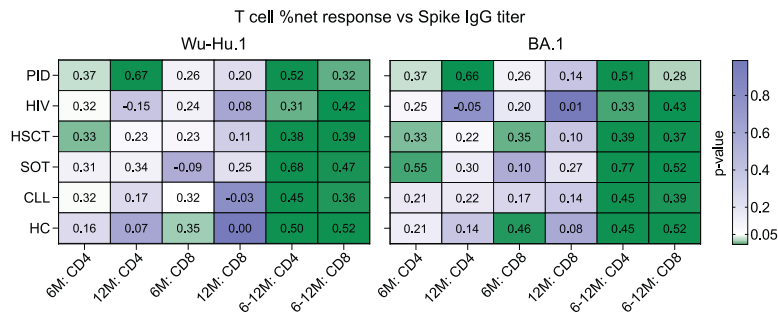

**B**

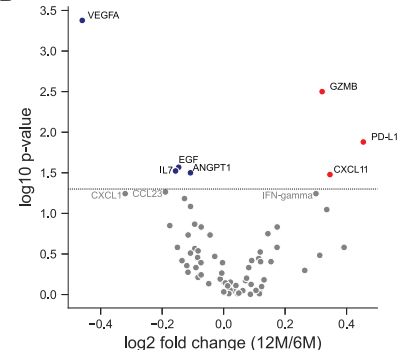

**Suppl. Fig. 3. Vaccine-induced T cell responses are synchronized with antibody titers and display an inflammatory immune signature. (A)** Correlation matrix of anti-Wu-Hu.1 and -Omicron BA.1 spike IgG with CD4<sup>+</sup> and CD8<sup>+</sup> T cell responses to Wu-Hu.1 full spike and Omicron full spike peptide pools, respectively, with indicated Spearman r (numbers) and p-values (color-code). **(B)** Volcano plot of differentially secreted proteins between 6M and 12M time points pooled across all patient groups. Significantly changed proteins are marked with color. Borderline non-significant proteins are visualized with names (n=30, equally distributed across groups).

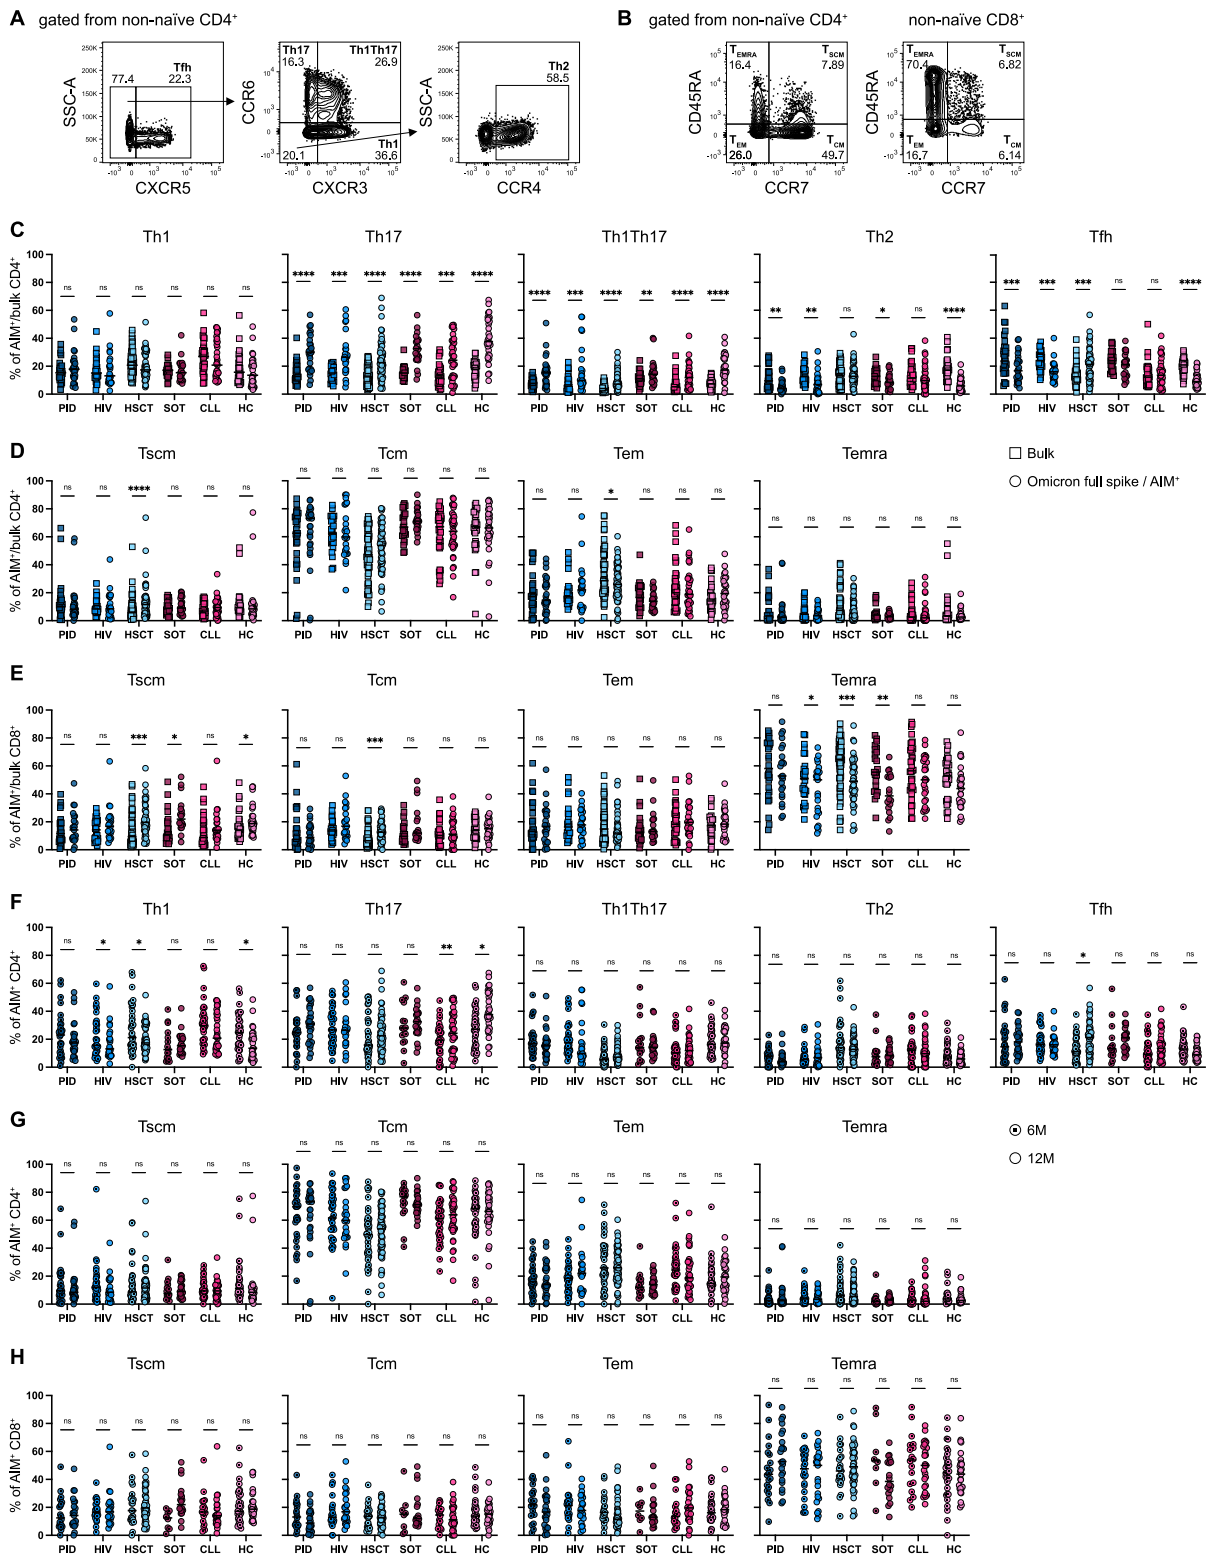

**Suppl. Fig. 4. T<sub>helper</sub> subsets and memory phenotypes of Omicron-reactive T cells before and after booster dose. (A)** Gating on T-helper subsets starting from non-naïve (i.e. non-CCR7<sup>+</sup>CD95<sup>-</sup>; see Suppl. Fig. 1A) CD4<sup>+</sup> T cells. **(B)** Gating on memory subsets starting from non-naïve CD4<sup>+</sup> and CD8<sup>+</sup> T cells. **(C)** Frequencies of indicated T<sub>helper</sub> subsets of Omicron-reactive T cells and CD4<sup>+</sup> bulk memory T cells at 12M time point. **(D)** Frequencies of indicated memory phenotypes of Omicron-reactive CD4<sup>+</sup> T cells and CD4<sup>+</sup> bulk memory T cells at 12M time point. **(E)** Frequencies of indicated memory phenotypes of Omicron-reactive CD8<sup>+</sup> T cells and CD8<sup>+</sup> bulk memory T cells at 12M time point. **(F)** Frequencies of indicated T<sub>helper</sub> subsets of Omicron-reactive T cells before and after booster dose. **(G)** Frequencies of indicated memory phenotypes of Omicron-reactive CD4<sup>+</sup> T cells before and after

booster dose. **(H)** Frequencies of indicated memory phenotypes of Omicron-reactive CD8<sup>+</sup> T cells before and after booster dose. (A, B) Numbers indicate the percentage of the previous gate. (C-G) Each dot represents one donor and lines depict the median. Wilcoxon matched-pairs signed rank test with Holm-Šidák posttest. \*\*\*\*p <0.0001, \*\*\*p <0.001, \*\*p <0.01, \*p <0.05.

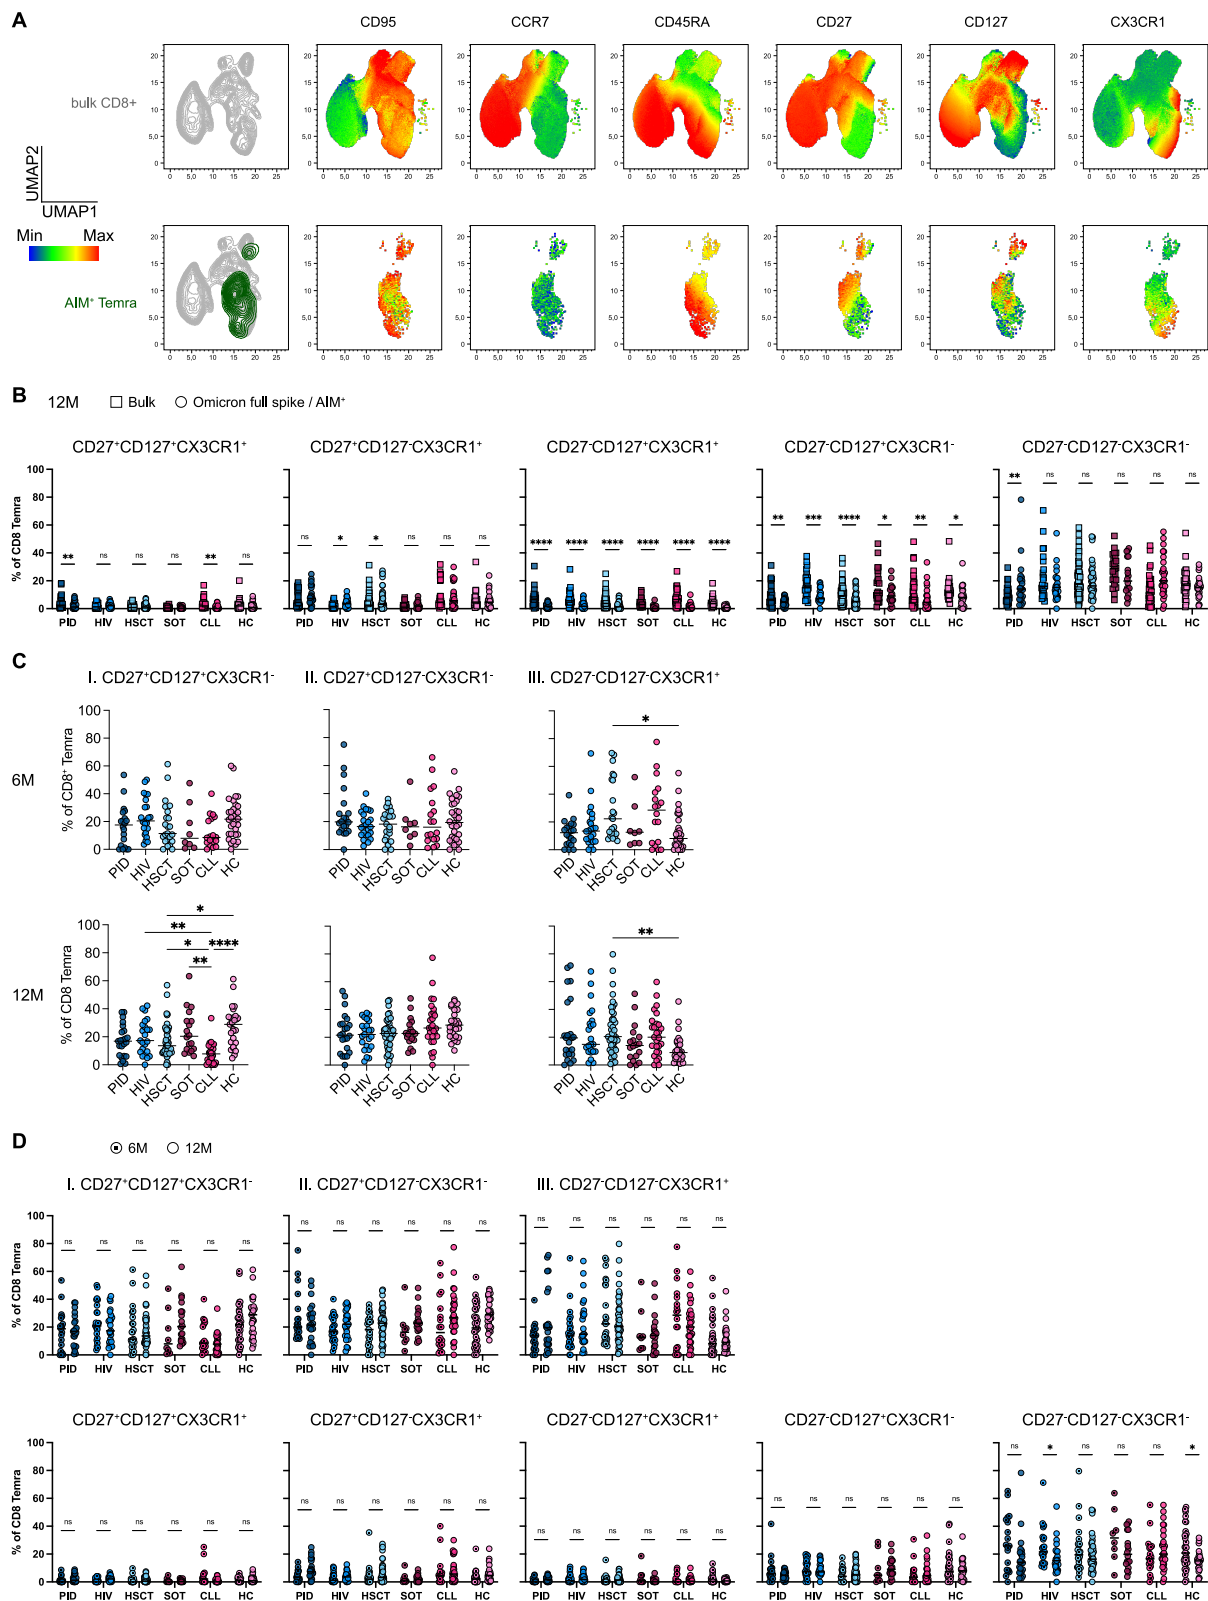

**Suppl. Fig. 5. Heterogeneity of Omicron spike-reactive CD8<sup>+</sup> T<sub>EMRA</sub> T cells. (A)** UMAP and heatmap visualization of differentiation markers of bulk CD8<sup>+</sup> memory T cells (upper row) and spike-reactive CD8<sup>+</sup> T<sub>EMRA</sub> T cells (lower row). **(B)** Frequencies of indicated Boolean gates of Omicron spike-reactive and bulk CD8<sup>+</sup> T<sub>EMRA</sub> cells based on the expression of CD27, CD127, and CX3CR1. Complementary data to Fig. 4B. **(C)** Comparison of frequencies of Omicron spike-reactive CD8<sup>+</sup> T<sub>EMRA</sub> subsets I-III between patient groups at 6M and 12M. **(D)** Frequencies of indicated Boolean gates of Omicron spike-reactive CD8<sup>+</sup> T cells based on the expression of CD27, CD127, and CX3CR1 before and after booster dose. (B to D) Each dot represents one donor, and lines depict the median. (B,

D) Wilcoxon matched-pairs signed rank test with Holm-Šidák posttest. (C) Kruskal-Wallis with Dunn's posttest. \*\*\*\* $p < 0.0001$ , \*\*\* $p < 0.001$ , \*\* $p < 0.01$ , \* $p < 0.05$ .

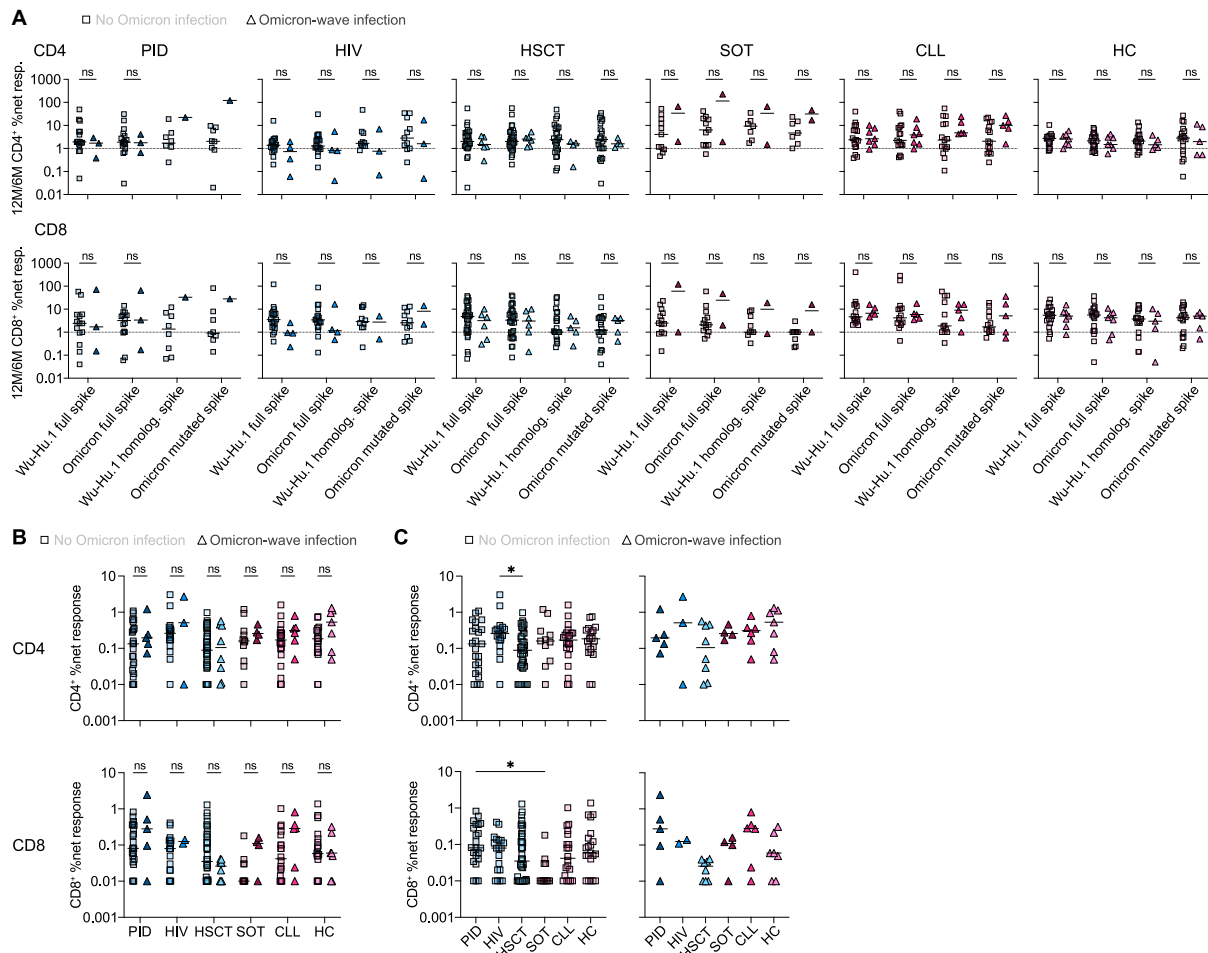

**Suppl. Fig. 6. Wu-Hu.1 and Omicron spike-specific responses in infected and non-infected individuals across all patient groups. (A)** Ratio of 12M/6M T cell responses to Wu-Hu.1 and Omicron spike peptide pools in Omicron-wave infected and non-infected individuals. **(B)** Net frequencies of T cell responses to the Omicron-mutated spike peptide pool in Omicron-wave infected and non-infected individuals across all patient groups. **(C)** Comparison of T cell response magnitudes to the Omicron-mutated spike peptide pool between patient groups in Omicron-wave infected and non-infected individuals. (A to C) Each dot represents one donor and lines depict the median. (A, B) Mann-Whitney test with Holm-Šidák posttest. (C) Kruskal Wallis test with Dunn's posttest. \* $p < 0.05$ .



## SUPPLEMENTARY TABLES

**Supplementary Table S1: Cohort characteristics at baseline, vaccine doses and sampling information**

|      | time point | n  | Female Sex | Age<br>median (IQR) | Vaccine doses                                  | Days between last<br>dose and sampling<br>median (IQR) | Subgroups                                                                                      |
|------|------------|----|------------|---------------------|------------------------------------------------|--------------------------------------------------------|------------------------------------------------------------------------------------------------|
| PID  | 6M         | 33 | 48.5%      | 41.0 (32.5–53.5)    | 2 (33/33)                                      | 176.0 (162.0–183.0)                                    | CVID (8/33)<br>XLA (4/33)<br>CD4–cytopenia (7/33)<br>Monogenic disease (8/33)<br>Other (6/33)  |
|      | 12M        | 28 | 50.0%      | 47.0 (39.0–55.5)    | 1 (1/28)<br>2 (5/28)<br>3 (13/28)<br>4 (9/28)  | 93.5 (36.5–139.8)                                      | CVID (10/28)<br>XLA (2/28)<br>CD4–cytopenia (7/28)<br>Monogenic disease (6/28)<br>Other (3/28) |
| HIV  | 6M         | 39 | 43.6%      | 54.0 (46.0–64.0)    | 2 (33/33)                                      | 181.0 (180.0–183.0)                                    | CD4 ≤300 (11/39)<br>CD4 >300 (28/39)                                                           |
|      | 12M        | 25 | 48.0%      | 56.0 (40.5–66.0)    | 2 (6/25)<br>3 (19/25)                          | 101.5 (67.0–151.8)                                     | CD4 ≤300 (8/25)<br>CD4 >300 (17/25)                                                            |
| HSCT | 6M         | 51 | 41.2%      | 59.0 (50.0–67.0)    | 1 (1/51)<br>2 (50/51)                          | 179.5 (176.3–180.0)                                    | CAR–T (3/51)<br>Early (3/51)<br>Intermediate (8/51)<br>Late (37/51)                            |
|      | 12M        | 59 | 47.5%      | 62.0 (53.0–68.0)    | 1 (1/59)<br>2 (1/59)<br>3 (21/59)<br>4 (36/59) | 41.0 (29.0–152.3)                                      | CAR–T (1/59)<br>Early (6/59)<br>Intermediate (9/59)<br>Late (43/59)                            |
| SOT  | 6M         | 23 | 43.5%      | 57.0 (47.0–67.0)    | 2 (33/33)                                      | 175.0 (167.8–177.0)                                    | ≤6mo (14/23)<br>>6mo w/ MMF (4/23)<br>>6mo w/o MMF (5/23)                                      |
|      | 12M        | 23 | 56.5%      | 52.0 (40.0–63.0)    | 3 (3/23)<br>4 (20/23)                          | 37.0 (26.0–42.8)                                       | ≤6mo (11/23)<br>>6mo w/ MMF (6/23)<br>>6mo w/o MMF (6/23)                                      |
| CLL  | 6M         | 39 | 33.3%      | 70.0 (63.0–75.0)    | 2 (33/33)                                      | 181.0 (179.0–182.0)                                    | BR/FCR (10/39)<br>Ibrutinib (12/39)<br>Indolent (8/39)<br>Off Ibrutinib (9/39)                 |
|      | 12M        | 35 | 34.3%      | 71.0 (63.0–75.0)    | 2 (2/35)<br>3 (4/35)<br>4 (29/35)              | 34.0 (22.0–39.0)                                       | BR/FCR (11/35)<br>Ibrutinib (7/35)<br>Indolent (10/35)<br>Off Ibrutinib (7/35)                 |
| HC   | 6M         | 42 | 54.8%      | 52.0 (32.8–68.3)    | 1 (2/42)<br>2 (40/42)                          | 182.0 (181.0–185.0)                                    | 18–39 yrs (17/42)<br>40–59 yrs (12/42)<br>>60 yrs (13/42)                                      |
|      | 12M        | 30 | 53.3%      | 53.0 (33.0–66.5)    | 2 (2/30)<br>3 (28/30)                          | 105.0 (93.0–138.5)                                     | 18–39 yrs (11/30)<br>40–59 yrs (11/30)<br>>60 yrs (8/30)                                       |

**Abbreviations:** n: number, IQR: interquartile range, PID: primary immunodeficiency disorders, HIV: human immunodeficiency virus type 1, HSCT: hematopoietic stem cell transplantation, SOT: solid organ transplantation, CLL: chronic lymphocytic leukemia, HC: healthy controls, 6M: 6 month, 12M: 12 month, CVID: common variable immunodeficiency, XLA: X-linked agammaglobulinemia, CAR–T: chimeric antigen receptor T cell therapy, mo: months, w/: with, w/o: without, MMF: mycophenolate mofetil, BR/FCR: previous treatment with bendamustine and rituximab / fludarabine, cyclophosphamide and rituximab

**Supplementary Table S2: Clinical parameters and demographics of Omicron-wave infected and non-infected individuals**

|      | Omicron wave | n  | Female Sex | Age<br>median (IQR) | Vaccine doses<br>at 12M                       | Disease score<br>(WHO, 1-10) | Subgroups                                                                                     |
|------|--------------|----|------------|---------------------|-----------------------------------------------|------------------------------|-----------------------------------------------------------------------------------------------|
| PID  | non-infected | 23 | 60.9%      | 47.0 (39.0–59.0)    | 1 (1/23)<br>2 (4/23)<br>3 (11/23)<br>4 (7/23) |                              | CVID (7/23)<br>XLA (1/23)<br>CD4–cytopenia (6/23)<br>Monogenic disease (6/23)<br>Other (3/23) |
|      | infected     | 5  | 0.0%       | 47.0 (37.0–50.5)    | 2 (1/5)<br>3 (2/5)<br>4 (2/5)                 | 1 (3/5)<br>2 (2/5)           | CVID (3/5)<br>XLA (1/5)<br>CD4–cytopenia (1/5)<br>Monogenic disease (0/5)<br>Other (0/5)      |
| HIV  | non-infected | 21 | 52.4%      | 60.0 (40.5–69.0)    | 2 (6/21)<br>3 (15/21)                         |                              | CD4 ≤300 (7/21)<br>CD4 >300 (14/21)                                                           |
|      | infected     | 4  | 0.0%       | 50.0 (37.0–55.5)    | 3 (4/4)                                       | 1 (4/4)                      | CD4 ≤300 (1/4)<br>CD4 >300 (3/4)                                                              |
| HSCT | non-infected | 51 | 47.1%      | 60.0 (52.0–67.0)    | 1 (1/51)<br>3 (16/51)<br>4 (34/51)            |                              | CAR-T (1/51)<br>Early (4/51)<br>Intermediate (8/51)<br>Late (38/51)                           |
|      | infected     | 8  | 50.0%      | 68.0 (62.0–70.3)    | 2 (1/8)<br>3 (5/8)<br>4 (2/8)                 | 1 (7/8)<br>5 (1/8)           | CAR-T (0/8)<br>Early (2/8)<br>Intermediate (1/8)<br>Late (5/8)                                |
| SOT  | non-infected | 17 | 58.8%      | 50.0 (37.5–63.0)    | 3 (2/17)<br>4 (15/17)                         |                              | ≤6mo (8/17)<br>>6mo w/ MMF (4/17)<br>>6mo w/o MMF (5/17)                                      |
|      | infected     | 6  | 50.0%      | 56.5 (37.5–63.3)    | 3 (1/6)<br>4 (5/6)                            | 1 (4/6)<br>3 (2/6)           | ≤6mo (3/6)<br>>6mo w/ MMF (2/6)<br>>6mo w/o MMF (1/6)                                         |
| CLL  | non-infected | 27 | 33.3%      | 70.0 (62.0–74.0)    | 2 (1/27)<br>3 (2/27)<br>4 (24/27)             |                              | BR/FCR (10/27)<br>Ibrutinib (5/27)<br>Indolent (7/27)<br>Off Ibrutinib (5/27)                 |
|      | infected     | 8  | 37.5%      | 74.5 (65.5–81.8)    | 2 (1/8)<br>3 (2/8)<br>4 (5/8)                 | 1 (7/8)<br>2 (1/8)           | BR/FCR (1/8)<br>Ibrutinib (2/8)<br>Indolent (3/8)<br>Off Ibrutinib (2/8)                      |
| HC   | non-infected | 23 | 52.2%      | 56.0 (36.0–69.0)    | 2 (1/23)<br>3 (22/23)                         |                              | 18–39 yrs (6/23)<br>40–59 yrs (9/23)<br>>60 yrs (8/23)                                        |
|      | infected     | 7  | 57.1%      | 33.0 (30.0–55.0)    | 2 (1/7)<br>3 (6/7)                            | 1 (7/7)                      | 18–39 yrs (5/7)<br>40–59 yrs (2/7)<br>>60 yrs (0/7)                                           |

**Abbreviations:** n: number, IQR: interquartile range, PID: primary immunodeficiency disorders, HIV: human immunodeficiency virus type 1, HSCT: hematopoietic stem cell transplantation, SOT: solid organ transplantation, CLL: chronic lymphocytic leukemia, HC: healthy controls, 6M: 6 month, 12M: 12 month, CVID: common variable immunodeficiency, XLA: X-linked agammaglobulinemia, CAR-T: chimeric antigen receptor T cell therapy, mo: months, w/: with, w/o: without, MMF: mycophenolate mofetil, BR/FCR: previous treatment with bendamustine and rituximab / fludarabine, cyclophosphamide and rituximab

**Supplementary Table S3: SARS-CoV-2 spike T cell epitopes previously reported immunodominant and from natural infection**

| No. | HLA    | Peptide     |
|-----|--------|-------------|
| 1   | A01:01 | WTAGAAAYY   |
| 2   | A01:01 | LTDEMIAQY   |
| 3   | A01:01 | CNDPFLGVYY  |
| 4   | A01:01 | FCNDPFLGVY  |
| 5   | A01:01 | PLLTDEMIAQY |
| 6   | A01:01 | QTLALHRSY   |
| 7   | A01:01 | SGWTAGAAAYY |
| 8   | A01:01 | SSANNCTFEY  |
| 9   | A01:01 | STECNLLL    |
| 10  | A01:01 | TDEMIAQY    |
| 11  | A01:01 | TTEILPVSM   |
| 12  | A02:01 | NLNEFLIDL   |
| 13  | A02:01 | RLDKVEAEVQI |
| 14  | A02:01 | RLITGRLQSL  |
| 15  | A02:01 | VLSFELLHA   |
| 16  | A02:01 | VLYQDVNCTEV |
| 17  | A02:01 | VTWFHAIHV   |
| 18  | A02:01 | YLQPRTFLL   |
| 19  | A02:01 | RLNEVAKNL   |
| 20  | A02:01 | YQDVNCTEV   |
| 21  | A02:01 | ALNTLVKQL   |
| 22  | A02:01 | HLMSFPQSA   |
| 23  | A03:01 | GVYFASTEK   |
| 24  | A03:01 | GVYYPDKVFR  |
| 25  | A03:01 | KCYGVSPTK   |
| 26  | A24:02 | QPVRVVLSF   |
| 27  | A24:02 | RVYSSANNCTF |
| 28  | A24:02 | TQDLFLPFF   |
| 29  | A24:02 | VYSTGSNVF   |
| 30  | A24:02 | YFPLQSYGF   |
| 31  | A24:02 | GYQPVRVVV   |
| 32  | A24:02 | NYNYLYRLF   |
| 33  | A24:02 | QYIKWPWYI   |
| 34  | A24:02 | YYHKNNKSW   |

|    |        |             |
|----|--------|-------------|
| 35 | A24:02 | EYVSPFLM    |
| 36 | A24:02 | IYKTPPIKDF  |
| 37 | A24:02 | YYVGYLQPRTF |
| 38 | A24:02 | TVYDPLQPEL  |
| 39 | A24:02 | YLQPRTFLL   |
| 40 | A24:02 | GNYNYLYRLF  |
| 41 | A24:02 | GYLQPRTF    |
| 42 | A24:02 | LFLPFFSNVTW |
| 43 | A24:02 | PFAMQMAYRF  |
| 44 | A24:02 | PFGEVFNATRF |
| 45 | A24:02 | SFKEELDKYF  |
| 46 | A24:02 | VFVSNQTHW   |
| 47 | A24:02 | VGYLQPRTFL  |
| 48 | B07:02 | SPRRARSV    |
| 49 | B07:02 | VVNQNAQAL   |
| 50 | B07:02 | APGQTGKIA   |
| 51 | B07:02 | APHGVVFL    |
| 52 | B07:02 | APHGVVFLHV  |
| 53 | B07:02 | KPSKRSFIEDL |
| 54 | B08:01 | LPQGFSAL    |
| 55 | B08:01 | QPYRVVVL    |
| 56 | B08:01 | FKNLREFVF   |
| 57 | B08:01 | DLPQGFSAL   |
| 58 | B08:01 | LITGRLQSL   |
| 60 | B08:01 | VFQTRAGCL   |
| 59 | B08:01 | VAKNLNESL   |
| 61 | B15:01 | CVADYSVLY   |
| 62 | B15:01 | GQTGKIADY   |
| 63 | B15:01 | GQTGKIADYNY |
| 64 | B35:01 | HADQLTPTW   |
| 65 | B35:01 | LPFNDGVYF   |
| 66 | B35:01 | VLPFNDGVYF  |

**Supplementary Table S4: SARS-CoV-2 T cell epitopes previously reported immunogenic and induced by vaccination**

| No. | HLA    | Peptide   |
|-----|--------|-----------|
| 1   | A01:01 | FTSDYYQLY |

|    |        |             |
|----|--------|-------------|
| 2  | A01:01 | FVFKNIDGY   |
| 3  | A01:01 | TILDGISQY   |
| 4  | A01:01 | TPSGTWLTY   |
| 5  | A01:01 | CTDDNALAYY  |
| 6  | A01:01 | CTEIDPKLDNY |
| 7  | A01:01 | FTCASEYTGNY |
| 8  | A01:01 | PTDNYITTY   |
| 9  | A01:01 | STECSNLLLQY |
| 10 | A01:01 | TTDPSFLGRY  |
| 11 | A01:01 | YFTSDYYQLY  |
| 12 | A02:01 | NLLLLFVTV   |
| 13 | A02:01 | SIWNLDYIINL |
| 14 | A02:01 | SLDTYPSLETI |
| 15 | A02:01 | SLIDLQEL    |
| 16 | A02:01 | SLINTLNDL   |
| 17 | A02:01 | SLLSVLLSM   |
| 18 | A02:01 | SMWSFNPET   |
| 19 | A02:01 | TLIVNSVLL   |
| 20 | A02:01 | YLDGADVTKI  |
| 21 | A02:01 | YLNTLTLAV   |
| 22 | A02:01 | YLVQQESPfv  |
| 23 | A02:01 | VLQLPQGTTL  |
| 24 | A02:01 | KVDGVDVEL   |
| 25 | A02:01 | VLNDILSRL   |
| 26 | A02:01 | YLDAYNMMI   |
| 27 | A02:01 | ALWEIQQV    |
| 28 | A02:01 | AVASKILGL   |
| 29 | A02:01 | FLAFVVFL    |
| 30 | A02:01 | HLVDFQVTIA  |
| 31 | A02:01 | KLKDCVMYA   |
| 32 | A02:01 | KLPDDFTGCV  |
| 33 | A02:01 | KLWAQCVQL   |
| 34 | A02:01 | LLLLDRLNQL  |
| 35 | A03:01 | KLFDYFKY    |
| 36 | A03:01 | KTFPTEPK    |
| 37 | A03:01 | KTFPTEPKK   |
| 38 | A03:01 | KTIQPRVEK   |

|    |        |             |
|----|--------|-------------|
| 39 | A03:01 | QVVNVVTTK   |
| 40 | A03:01 | RASANLAATK  |
| 41 | A03:01 | VTNNTFTLK   |
| 42 | A24:02 | SYATHSDKF   |
| 43 | A24:02 | FYAYLRKHF   |
| 44 | A24:02 | QYIKWPWYI   |
| 45 | A24:02 | SYFTSDYYQLY |
| 46 | A24:02 | PFVVSTGYHF  |
| 47 | A24:02 | SWMESEFRV   |
| 48 | A24:02 | VYRGTTTYKL  |
| 49 | B07:02 | EPVLKGVKL   |
| 50 | B07:02 | LPQGFSAL    |
| 51 | B07:02 | MIAQYTSAL   |
| 52 | B07:02 | TPINLVRDL   |
| 53 | B07:02 | SPRRARVA    |
| 54 | B07:02 | TPCSFGGVS   |
| 55 | B08:01 | TLDSKTQSL   |
| 56 | B08:01 | MIAQYTSAL   |

**Supplementary Table S5: Omicron variant (B.1.1.529) T cell epitopes**

| No. | HLA        | Peptide     |
|-----|------------|-------------|
| 1   | HLA-A01:01 | QTGNIADYNY  |
| 2   | HLA-A01:01 | KLDSKVSGNY  |
| 3   | HLA-A01:01 | VSGNYNYLY   |
| 4   | HLA-A01:01 | GAEYVNNSY   |
| 5   | HLA-A01:01 | KSYGFQPTY   |
| 6   | HLA-A01:01 | RSDVLLPFTQY |
| 7   | HLA-A01:01 | CNDPFLDHK   |
| 8   | HLA-A01:01 | FCNDPFLDHKN |
| 9   | HLA-A01:01 | LAPFFTFKCY  |
| 10  | HLA-A01:01 | LAPFFAFKCY  |
| 11  | HLA-A02:01 | NIADYNYKL   |
| 12  | HLA-A02:01 | VLYQGVNCTEV |
| 13  | HLA-A02:01 | KLQDVVNHNA  |
| 14  | HLA-A02:01 | FLARGVVM    |
| 15  | HLA-A02:01 | KLLEEWNLV   |

|    |            |             |
|----|------------|-------------|
| 16 | HLA-A02:01 | SVLNDIFSRL  |
| 17 | HLA-A02:01 | VLNDIFSRL   |
| 18 | HLA-A02:01 | WLDMVDTSF   |
| 19 | HLA-A02:01 | LLWPVTLTC   |
| 20 | HLA-A03:01 | HVISGTNGTK  |
| 21 | HLA-A03:01 | GVYFASIEK   |
| 22 | HLA-A03:01 | NLAPFFTFK   |
| 23 | HLA-A03:01 | TLVKQLSSK   |
| 24 | HLA-A03:01 | KSYGFQPTY   |
| 25 | HLA-A24:02 | IYSKHTPII   |
| 26 | HLA-A24:02 | LYNLAPFFTF  |
| 27 | HLA-A24:02 | IYKTPPIKYF  |
| 28 | HLA-A24:02 | KYFGGFNF    |
| 29 | HLA-A24:02 | PFDEVFNATRF |
| 30 | HLA-A24:02 | LYQPPQISI   |
| 31 | HLA-A24:02 | QGYKSVNIIF  |
| 32 | HLA-A24:02 | YFPLRSYSF   |
| 33 | HLA-A24:02 | YFPLRSYGF   |
| 34 | HLA-B07:01 | TPIIVRDLP   |
| 35 | HLA-B07:01 | TPIIVREPE   |
| 36 | HLA-B07:01 | VAKSHNITL   |
| 37 | HLA-B08:01 | HQPYRVVVL   |
| 38 | HLA-B08:01 | AQKFKGLTV   |

**Supplementary Table S6: Antibody list**

| Antibody (clone)     | Catalog number | Source         | RRID       |
|----------------------|----------------|----------------|------------|
| CD3–BUV805 (UCHT1)   | 612895         | BD Biosciences | AB_2870183 |
| CCR6–BUV737 (11A9)   | 612780         | BD Biosciences | AB_2870109 |
| CD4–BUV496 (SK3)     | 612936         | BD Biosciences | AB_2870220 |
| CD8–BUV395 (RPA-T8)  | 563795         | BD Biosciences | AB_2722501 |
| CD27–BV786 (O323)    | 302832         | Biolegend      | AB_2562674 |
| CD69–BV650 (FN50)    | 310934         | Biolegend      | AB_2563158 |
| CD45RA–BV570 (HI100) | 304132         | BioLegend      | AB_2563813 |
| CD14–BV510 (M5E2)    | 301842         | BioLegend      | AB_2561946 |
| CD19–BV510 (HIB19)   | 302242         | BioLegend      | AB_2561668 |
| CD154–BV421 (24-31)  | 310824         | BioLegend      | AB_2562721 |

|                                    |             |                |             |
|------------------------------------|-------------|----------------|-------------|
| CCR4-BB700 (1G1)                   | 566475      | BD Biosciences | AB_2744302  |
| CXCR5-BB515 (RF8B2)                | 564624      | BD Biosciences | AB_2738871  |
| CD137-PE-Cy7 (4B4-1)               | 309818      | BioLegend      | AB_2207741  |
| CD127-PE/Cyanine5 (A019D5)         | 351324      | BioLegend      | AB_10915554 |
| CD95-PE/Dazzle™ 594 (DX2)          | 305634      | BioLegend      | AB_2564221  |
| CX3CR1-PE (2A9-1)                  | 341604      | BioLegend      | AB_1595456  |
| CX3CR1-BUV661 (2A9-1)              | 750690      | BD Biosciences | AB_2874813  |
| CCR7-APC-Cy7 (G043H7)              | 353212      | BioLegend      | AB_10916390 |
| CXCR3-AF647 (G025H7)               | 353712      | BioLegend      | AB_10962948 |
| CD57-Pacific Blue (HNK-1)          | 359608      | BioLegend      | AB_2562459  |
| Granzyme B-BB790 (GB11)            | 624296      | BD Biosciences | Custom      |
| Granzyme K-PerCP-eFluor710 (G3H69) | 46-8897-42  | ThermoFisher   | AB_2573854  |
| TCF1-AF488 (C63D9)                 | 6444S       | Cell Signaling | n/a         |
| KLRG1-PE (REA261)                  | 130-120-566 | Miltenyi       | AB_2784406  |
